# Supplementary material for: Are Leading Risk Factors for Cancer and Mental Disorders Multimorbidity Shared by These Two Individual Conditions in Community-Dwelling Middle-Aged Adults?
Source: MDPI journal article supplement (doi:10.3390/cancers12061700), 2020-06-26
Supplement: s1 [file s1]

*Article*

# Are Leading Risk Factors for Cancer and Mental Disorders Multimorbidity Shared by These Two Individual Conditions in Community-Dwelling Middle-Aged Adults?

Xianwen Shang, Allison M. Hodge, Wei Peng, Mingguang He, and Lei Zhang

## Supplementary Materials

### Text S1. Classification of Independent Variables

This section describes how the baseline data for independent variables were collected and the classification of these variables.

Participants were classified as current, former and never smokers based on two questions: “Have you ever been a regular smoker?” and “Are you a regular smoker now?”. Passive smoking was self-reported in hours per week at home or in other places and was divided in two groups as passive smoking or not.

Alcohol intake was calculated based on two questions: “About how many alcoholic drinks do you have each week?” and “On how many days each week do you usually drink alcohol?”. Responses were then categorized according to number of drinks per week (0, 1–4, 5–7, 8–14, or >14) using the National Health and Medical Research Council definitions, with more than two drinks per day (14 drinks/week) considered as consuming “risky” levels of alcohol.

Physical activity was measured using the Active Australia Survey where the total time one spent on walking, moderate-intensity, and vigorous-intensity physical activity (bouts of at least 10 min) in the previous week was assessed [1]. Questions were also asked about number of hours spent on sitting, watching television, and sleep in a typical 24-h day.

Sleep and sitting time were assessed using the following question: “About how many hours in each 24 h day do you usually spend doing the following: sleeping and sitting?”. Sleep duration was divided into three groups: <7, 7–9, and >9 h. Sitting time was categorized into two groups as ≤8 or >8 h per day.

Outdoor time per day was assessed using the following question: “About how many hours a day would you usually spend outdoors on a weekday and on the weekend?”. An average outdoor time per day in one week in hours was calculated based on the time spent on workdays and weekend days, and it was categorized into five groups according to the quintiles.

Frequency of dietary intakes including vegetable, fruit, breakfast cereal, milk, fish, chicken, red meat, and processed meat per week or per day was recorded based on separate questions. Vegetable intake was divided into five groups according to the quintiles based on the following question: “About how many serves of vegetables do you usually eat each day? A serve is half a cup of cooked vegetables or one cup of salad”. Fruit intake was divided into four groups: none, one serving/day, two servings/day, and three or more servings/day based on the following question: “About how many serves of fruit or glasses of fruit juice do you usually have each day? A serve is one medium piece or two small pieces or one cup of diced or canned fruit pieces”. Fish intake was divided into three groups: none, one serving per week, and two or more servings per

week based on the following question: “About how many times each week do you eat?”. The same question was asked for chicken, red meat, and processed meat. Milk intake was categorized as none, skimmed fat/reduced fat/soy milk, and whole milk based on the following question: “Which type of milk do you mostly have?”. Breakfast cereal was defined as non-high-fiber and high-fiber groups based on the following question: “If you eat breakfast cereal, is it usually bran cereal (all bran, bran flakes, etc.), muesli, biscuit cereal (weetbix, shredded wheat etc.), oat cereal (porridge, etc.), or other (cornflakes, rice bubbles, etc.)?”.

Socioeconomic status was also assessed using the Index of Relative Socio-economic Disadvantage according to postcode that ranks the income, qualifications, and skilled occupations of residents within an area [2]. Participants were divided into five groups according to the quintiles of Index of Relative Socio-economic Disadvantage, with the lowest quintile representing the greatest socio-economic disadvantage. Health insurance was divided into four groups: private with extras, private no extras, healthcare concession, and none of the above.

Geographic remoteness was divided into four groups including major cities, inner regional area, outer regional area, and remoteness using the Accessibility Remoteness Index of Australia [3].

Psychological distress was accessed using the Kessler-10 scale [4], which provides a global measure of anxiety and depressive symptoms experienced in the preceding month. Scores range from 10 to 50, with the following categories: low (10–11), mild (12–15), moderate (16–21), and high (22–50) psychological distress.

Self-reported quality of life was classified as excellent, very good, good, fair, or poor based on the following question: “In general, how would you rate your quality of life?”.

Self-reported overall health was classified as excellent, very good, good, fair, or poor based on the following question: “In general, how would you rate your overall health?”.

Four questions from the Duke Social Support Scale asked the respondent how many times per week they spend time with friends or family they do not live with (0, 1–2, and  $\geq 3$  were scored as 1, 2, and 3, respectively), talk to someone (friends, relatives or others) on the telephone (0–1, 2–5, and  $\geq 6$  were scored as 1, 2, and 3, respectively), spend time at meetings of social clubs, religious/other groups (0–1, 2–5, and  $\geq 6$  were scored as 1, 2, and 3, respectively), and how many people outside home, within 1 h of travel they can depend on or feel very close to (0, 1–2 and  $\geq 3$  were scored as 1, 2, and 3 respectively) [5]. The total social interaction score ranged from 4–12 and was categorized as low (4–6), moderate (7–9), and high levels (10–12).

Family history of chronic diseases including heart disease, stroke, hypertension, cancer, diabetes, Alzheimer’s, Parkinson’s disease, depression, arthritis, osteoporosis, and hip fractures was self-reported.

Overall, 48 potential predictors for multimorbidity of cancer and mental disorders were included in the analysis.

## **Text S2. The Interaction Between the Onsets of Cancer and Mental Disorders**

We used Cox proportional regression models to assess the interaction between the onsets of cancer and mental disorders. The incidence of the corresponding primary condition within seven years in all participants at baseline was considered as the reference group. For example, to examine whether cancer as the primary condition would increase the risk of mental disorders as the secondary condition, the comparison was conducted between the incidence of mental disorders as the secondary condition in participants with cancer as the primary condition, and mental disorders as the primary condition in the total population. To enable comparison, the onset of primary and secondary condition was restricted to the cases occurring within the first seven years for this

specific analysis, where participants with follow-up time <7 years for the secondary condition were excluded.

### **Text S3. Description of Machine Learning Method**

This section describes how we applied random forest to evaluate the importance of predictors.

#### *Factorization of Features*

The data were factorized into a labeled dataset containing the independent variables (potential predictors were listed in Table 1) and the dependent variable (participants were free of 13 chronic conditions in the nine years following the baseline date) using h2o. We used the whole dataset as both training and testing data as we aimed only to obtain the variable importance metric. We applied the commonly used machine learning method random forest in the analysis.

#### *Random Forest*

Random forest is widely applied in research since its creation. The random forest algorithm is a supervised learning algorithm constructing an ensemble of decision trees using randomly bootstrapping sample datasets and averaging predictions of its trees [6]. It applies a bagging method to ensemble multiple decision trees generated from subsets to reduce correlations among the constitute decision trees. A lower correlation between decision trees is associated with a lower forest error rate. Random forest has its robustness to reduce noise and overfitting, given that the datasets are built independently using bagging method [6,7]. The strength of each individual tree in the forest is another determinist factor for the forest error rate. In this study, we used the area under curve to determine the best predicting variable and location for each tree split in our algorithm. We grew the forest with 500 trees. A five-fold cross-validation was conducted to test if the model was overfitting even though random forest is less likely to be overfitting compared with other methods [6]. We implemented grid search to obtain optimal parameters including the number of variables randomly sampled as candidates at each split and the max depth of each tree (effectively the number of interactions are considered in the model) for random forest. A range of values for each hyper-parameter was specified, and all possible combinations of the hyper-parameters were examined, while the combination with the highest cross-validation performance metric was obtained. There are several indices for the model performance, and maximization of the area under the receiver operating characteristic curve was applied in this study. For example, random forest has hyper-parameters specifying the number of trees and the max depth of each tree (effectively how many interactions are considered in the model), whereas the decision rules are the parameters.

We set the parameter nthreads as 1 as to make use of all available cores on the system.

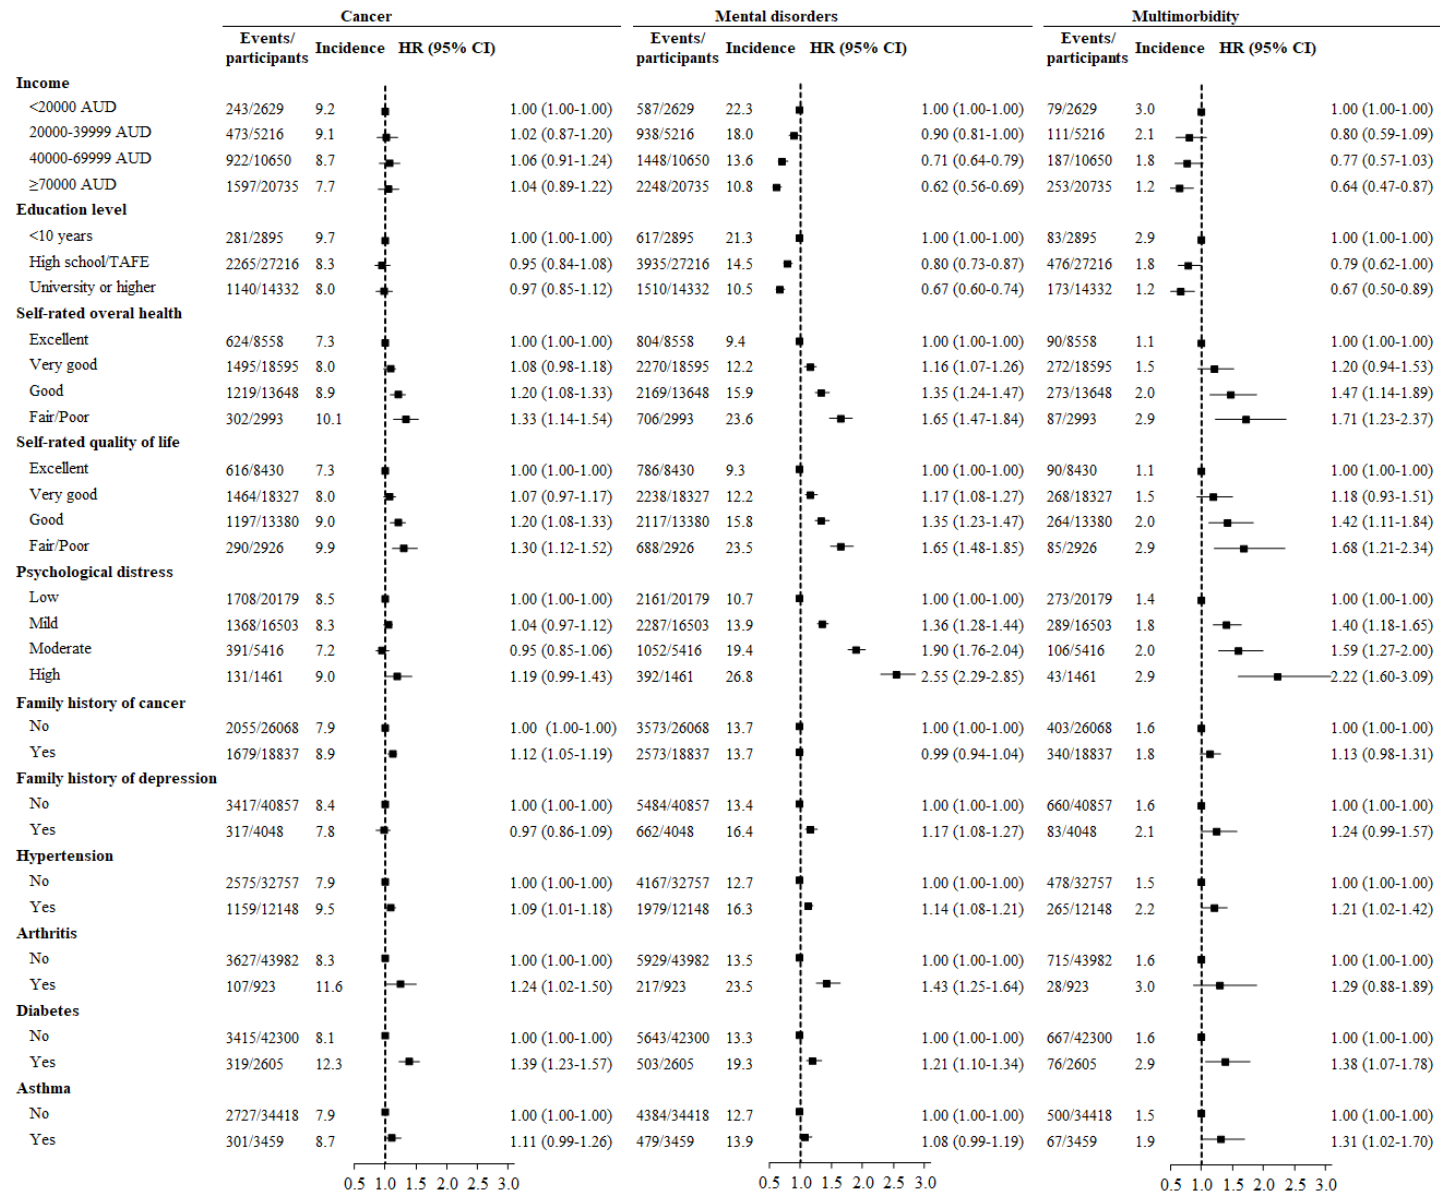

**Figure S1.** Hazard ratios for incident cancer, mental disorders, and multimorbidity associated with age, socioeconomic status, self-rated health and psychological distress, and history and family history of chronic conditions in men. Hazard ratios were assessed using Cox regression models adjusted for age, country of birth, income, education, work status, number of children, BMI, psychological distress, hypertension, dyslipidemia, diabetes, asthma, arthritis, hip replacement, and family history of cancer, depression, heart disease, stroke, diabetes, hypertension, Parkinson's disease, and dementia.

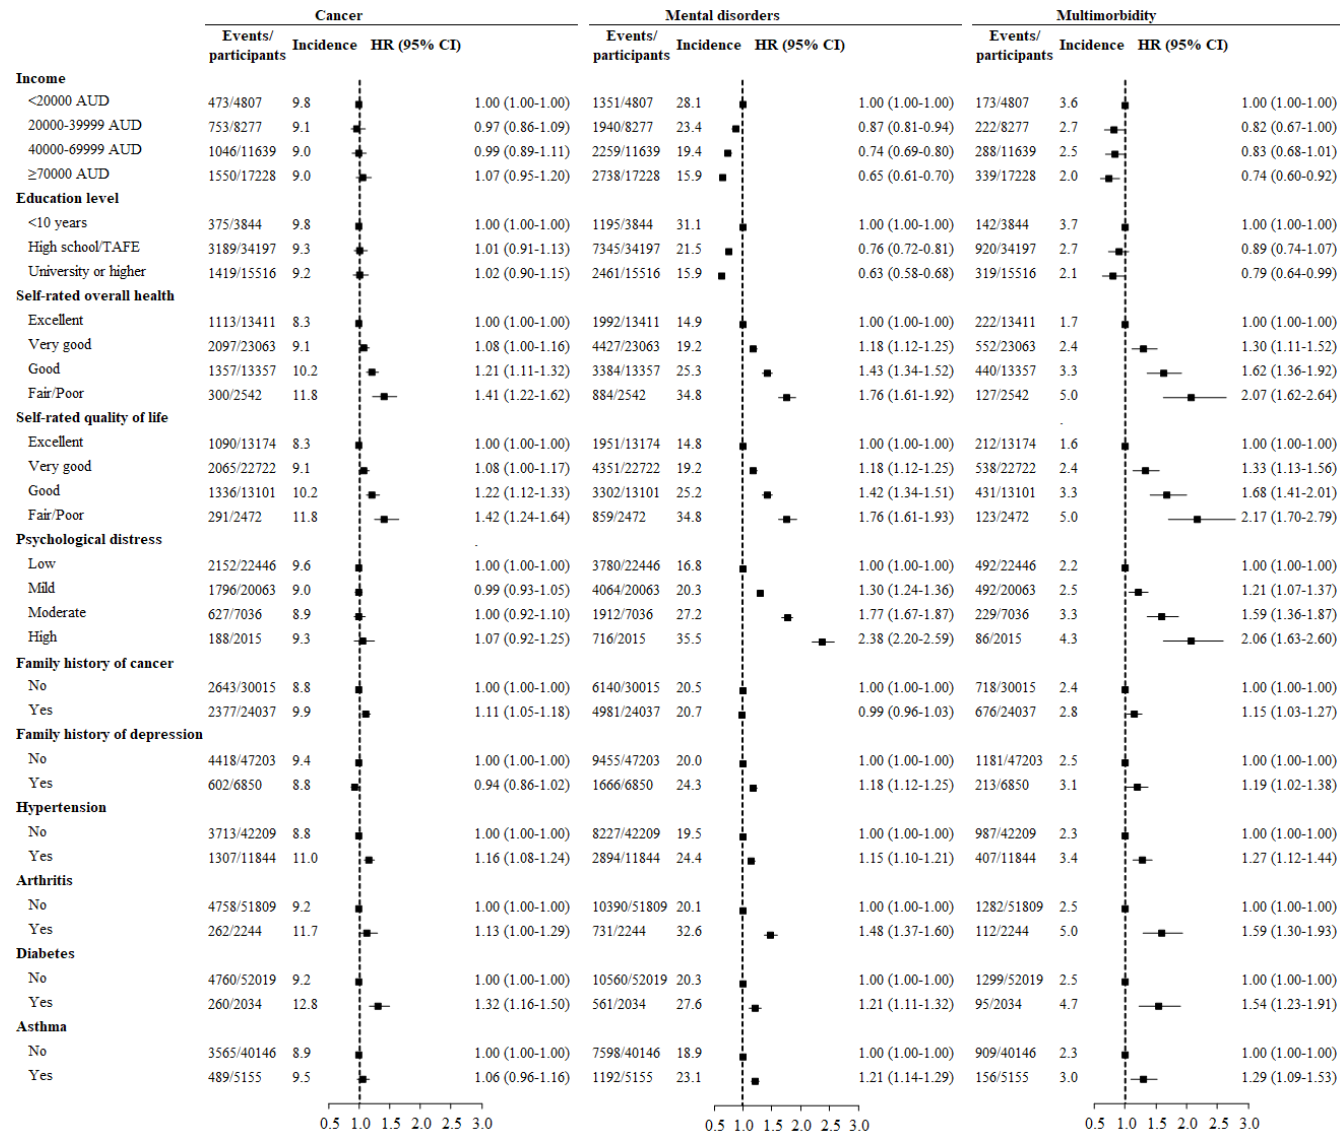

**Figure S2.** Hazard ratios for incident cancer, mental disorders and multimorbidity associated with age, socioeconomic status, self-rated health and psychological distress, and history and family history of chronic conditions in women. Hazard ratios were assessed using Cox regression models adjusted for age, country of birth, income, education, work status, number of children, BMI, psychological distress, hypertension, dyslipidemia, diabetes, asthma, arthritis, hip replacement, and family history of cancer, depression, heart disease, stroke, diabetes, hypertension, Parkinson's disease, and dementia.

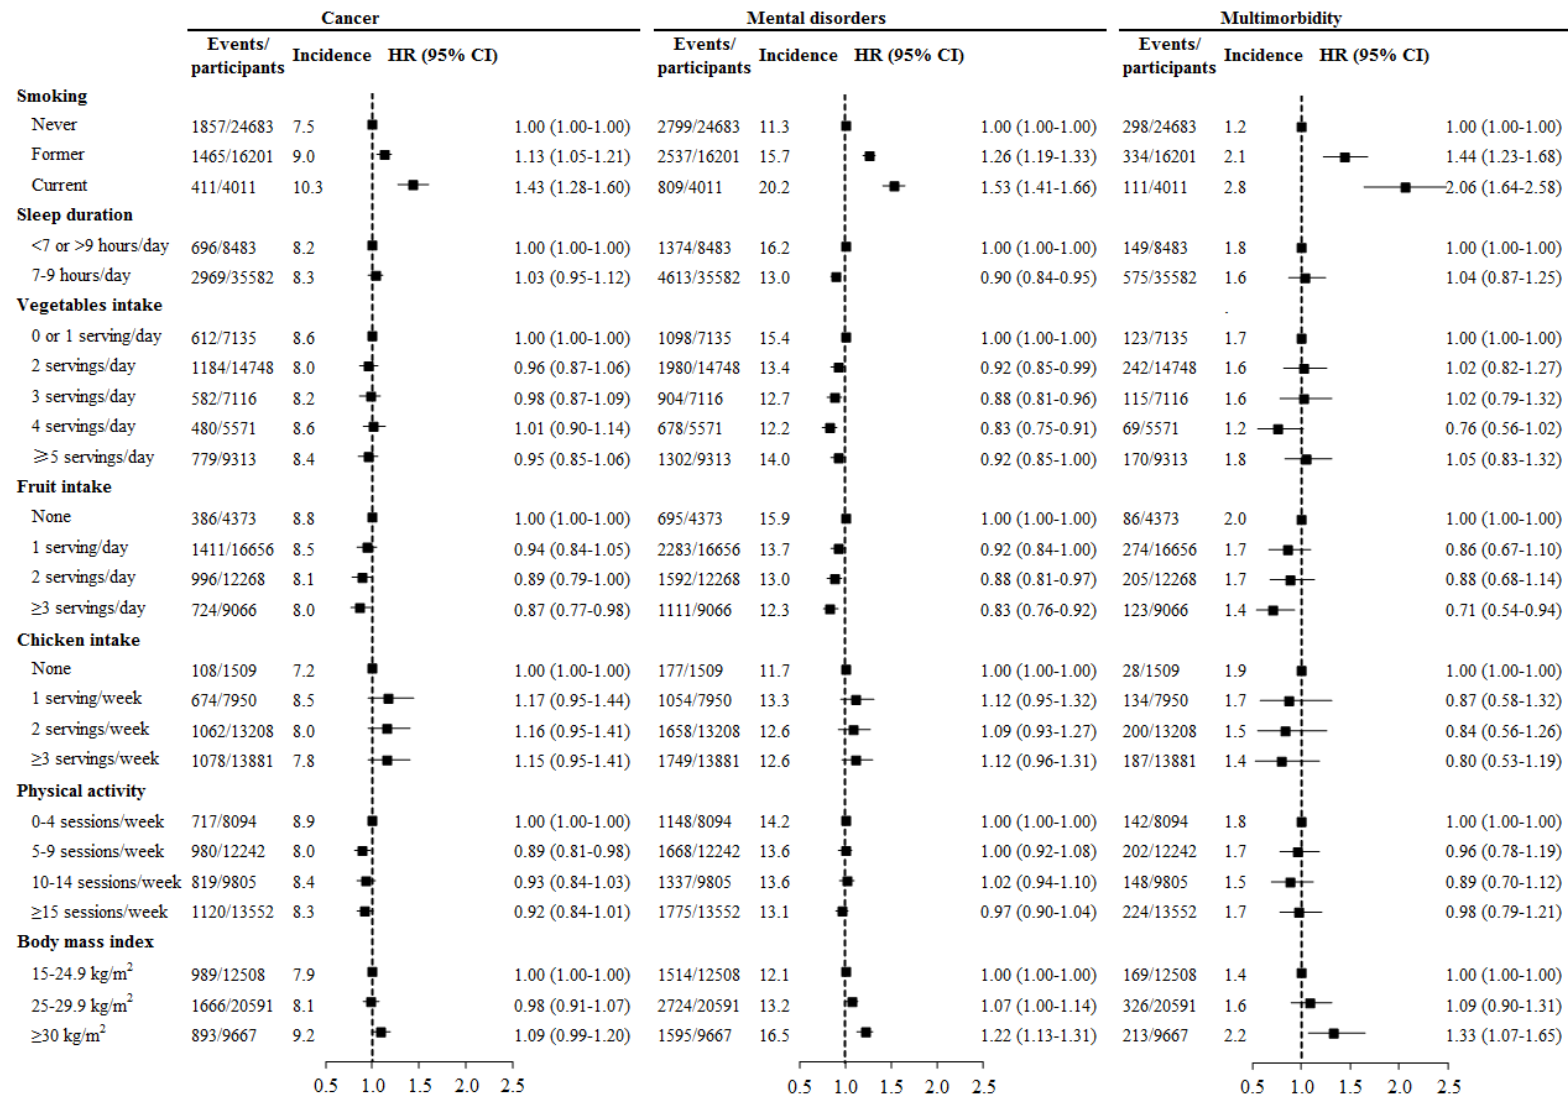



**Figure S3.** Hazard ratios for incident cancer, mental disorders, and multimorbidity associated with behavioral factors in men. Hazard ratios were assessed using Cox regression models adjusted for age, country of birth, income, education, work status, number of children, BMI, psychological distress, hypertension, dyslipidemia, diabetes, asthma, arthritis, hip replacement, and family history of cancer, depression, heart disease, stroke, diabetes, hypertension, Parkinson's disease, and dementia.

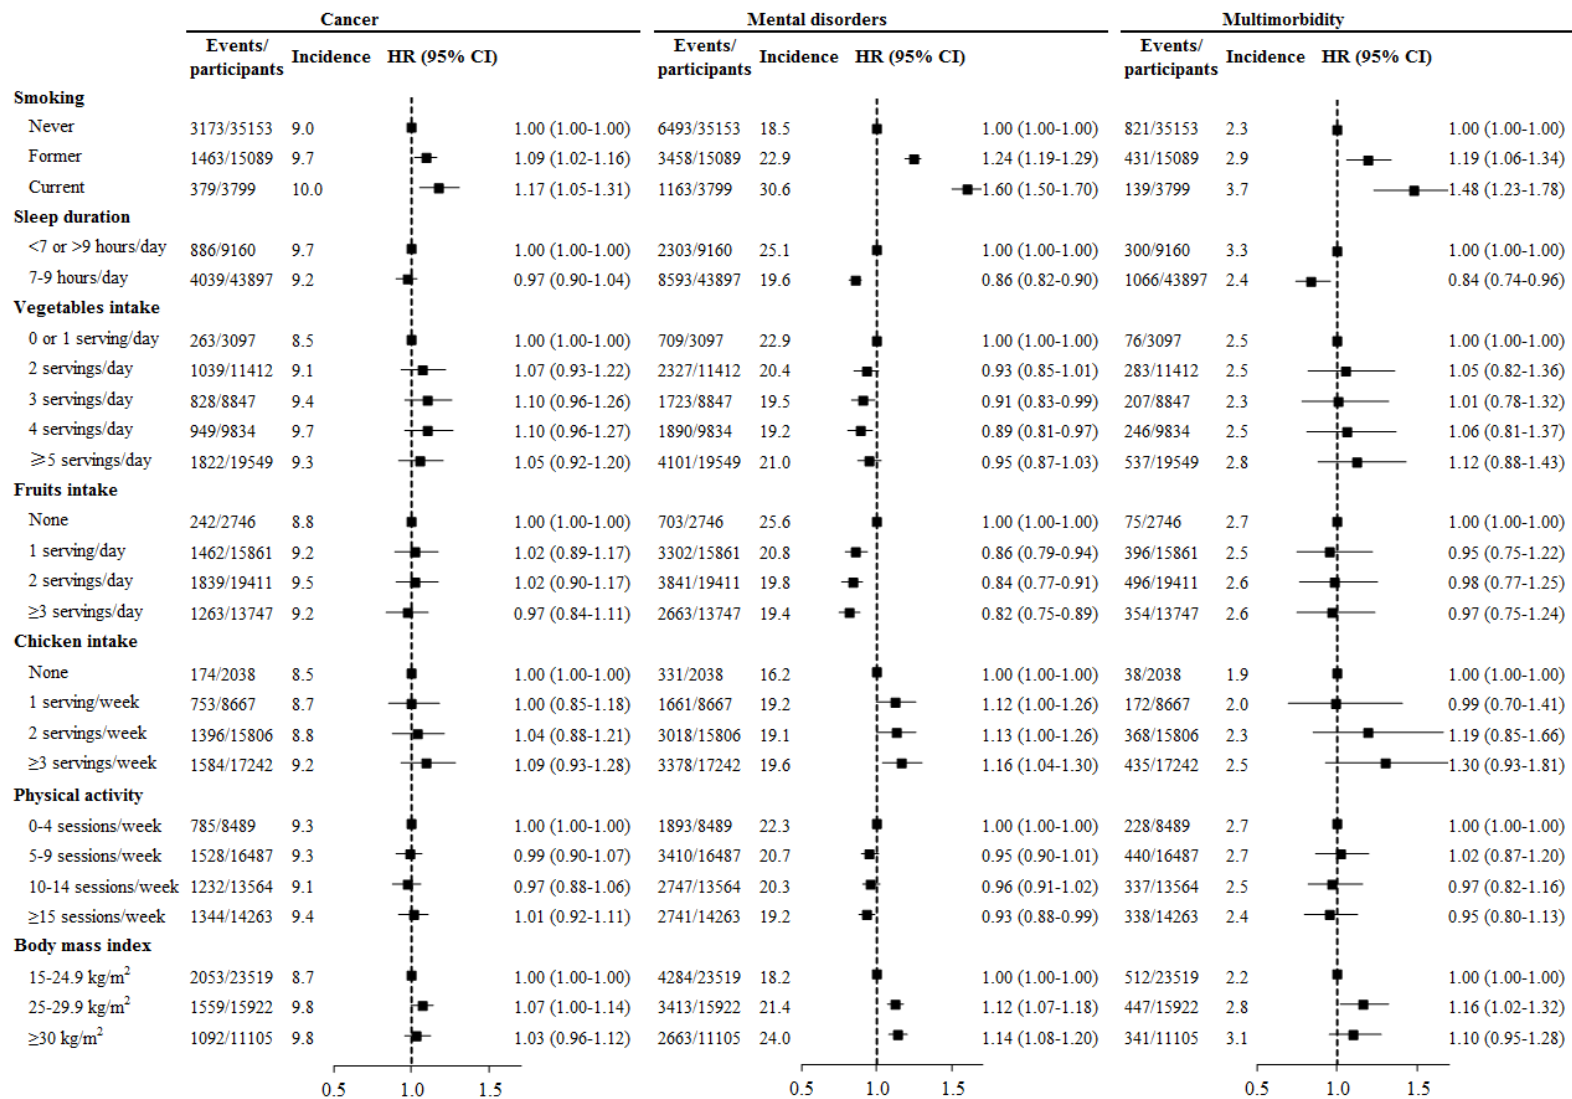

**Figure S4.** Hazard ratios for incident cancer, mental disorders, and multimorbidity associated with behavioral factors in women. Hazard ratios were assessed using Cox regression models adjusted for age, country of birth, income, education, work status, number of children, BMI, psychological distress, hypertension, dyslipidemia, diabetes, asthma, arthritis, hip replacement, and family history of cancer, depression, heart disease, stroke, diabetes, hypertension, Parkinson's disease, and dementia.

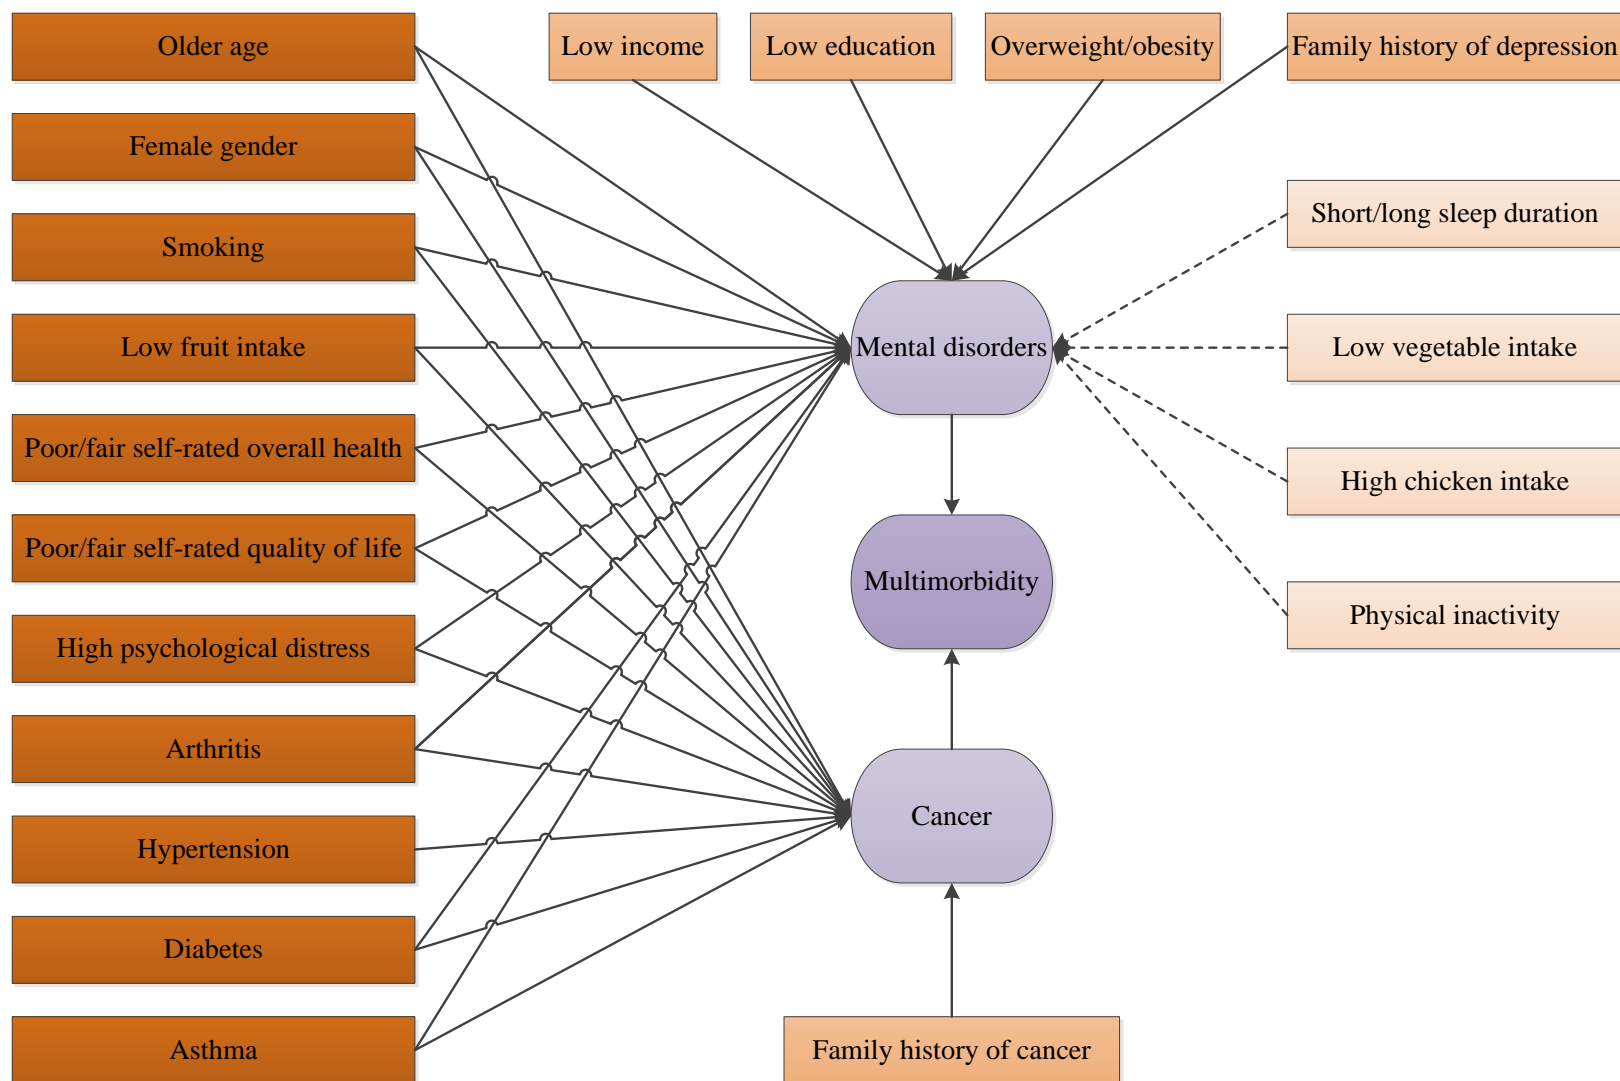

**Figure S5.** Classification of risk factors for incident cancer, mental disorders, and multimorbidity. The risk factors were categorized into four groups according to their relationships with cancer, mental disorders, and multimorbidity presented in Figure 1–4 and Figure S2–S7. Older age, female gender, smoking, low fruit intake, poor/fair self-rated health, poor/fair self-rated quality of life, high psychological distress, hypertension, arthritis, asthma, and diabetes were classified as shared risk factors for cancer and mental disorders as they were associated with an increased risk of incident cancer, mental disorders, and multimorbidity. Low education, low income, overweight/obesity, and family history of depression were classified as risk factors for mental disorders given that they were associated with an increased risk of incident mental disorders but not incident cancer, and their positive association with multimorbidity might depend on mental disorders. Family history of cancer was classified as a risk factor for cancer given that it was associated with an increased risk of incident cancer but not incident mental disorders and its positive association with multimorbidity might depend on cancer. Long/short sleep duration, low vegetable intake, high chicken intake, and physical inactivity were classified as risk factors for mental disorders only since they were associated with an increased risk of incident mental disorders but not incident cancer or multimorbidity.

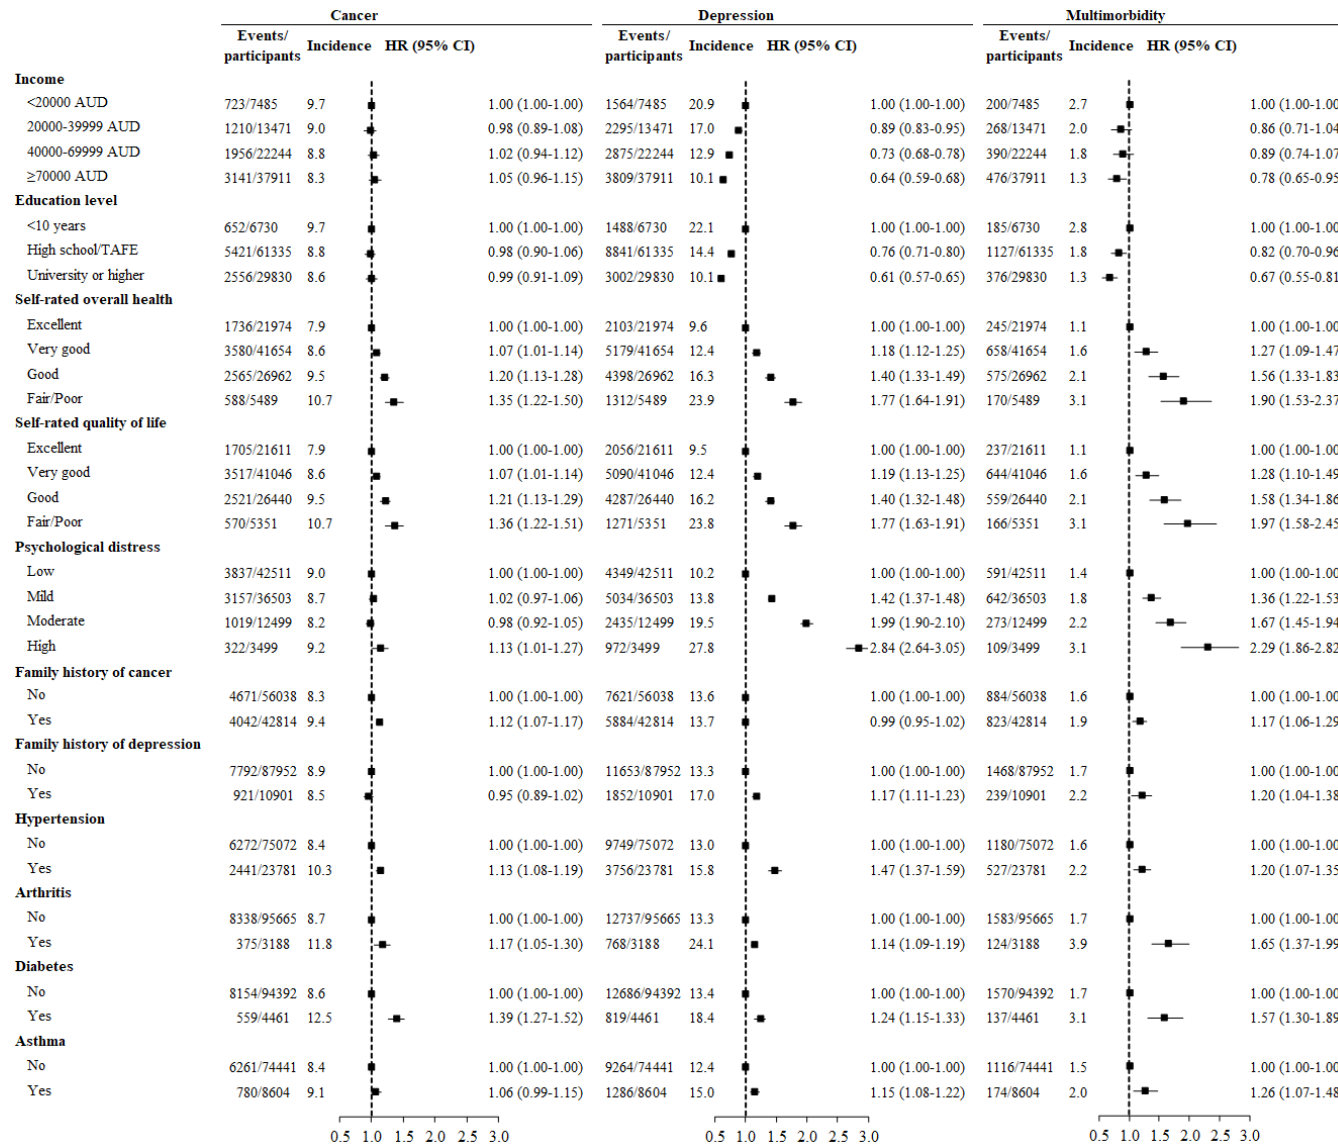

**Figure S6.** Hazard ratios for incident cancer, depression, and multimorbidity associated with age, socioeconomic status, self-rated health and psychological distress, and history and family history of chronic conditions. Hazard ratios were assessed using Cox regression models adjusted for age, gender, country of birth, income, education, work status, number of children, BMI, psychological distress, hypertension, dyslipidemia, diabetes, asthma, arthritis, hip replacement, and family history of cancer, depression, heart disease, stroke, diabetes, hypertension, Parkinson's disease, and dementia.

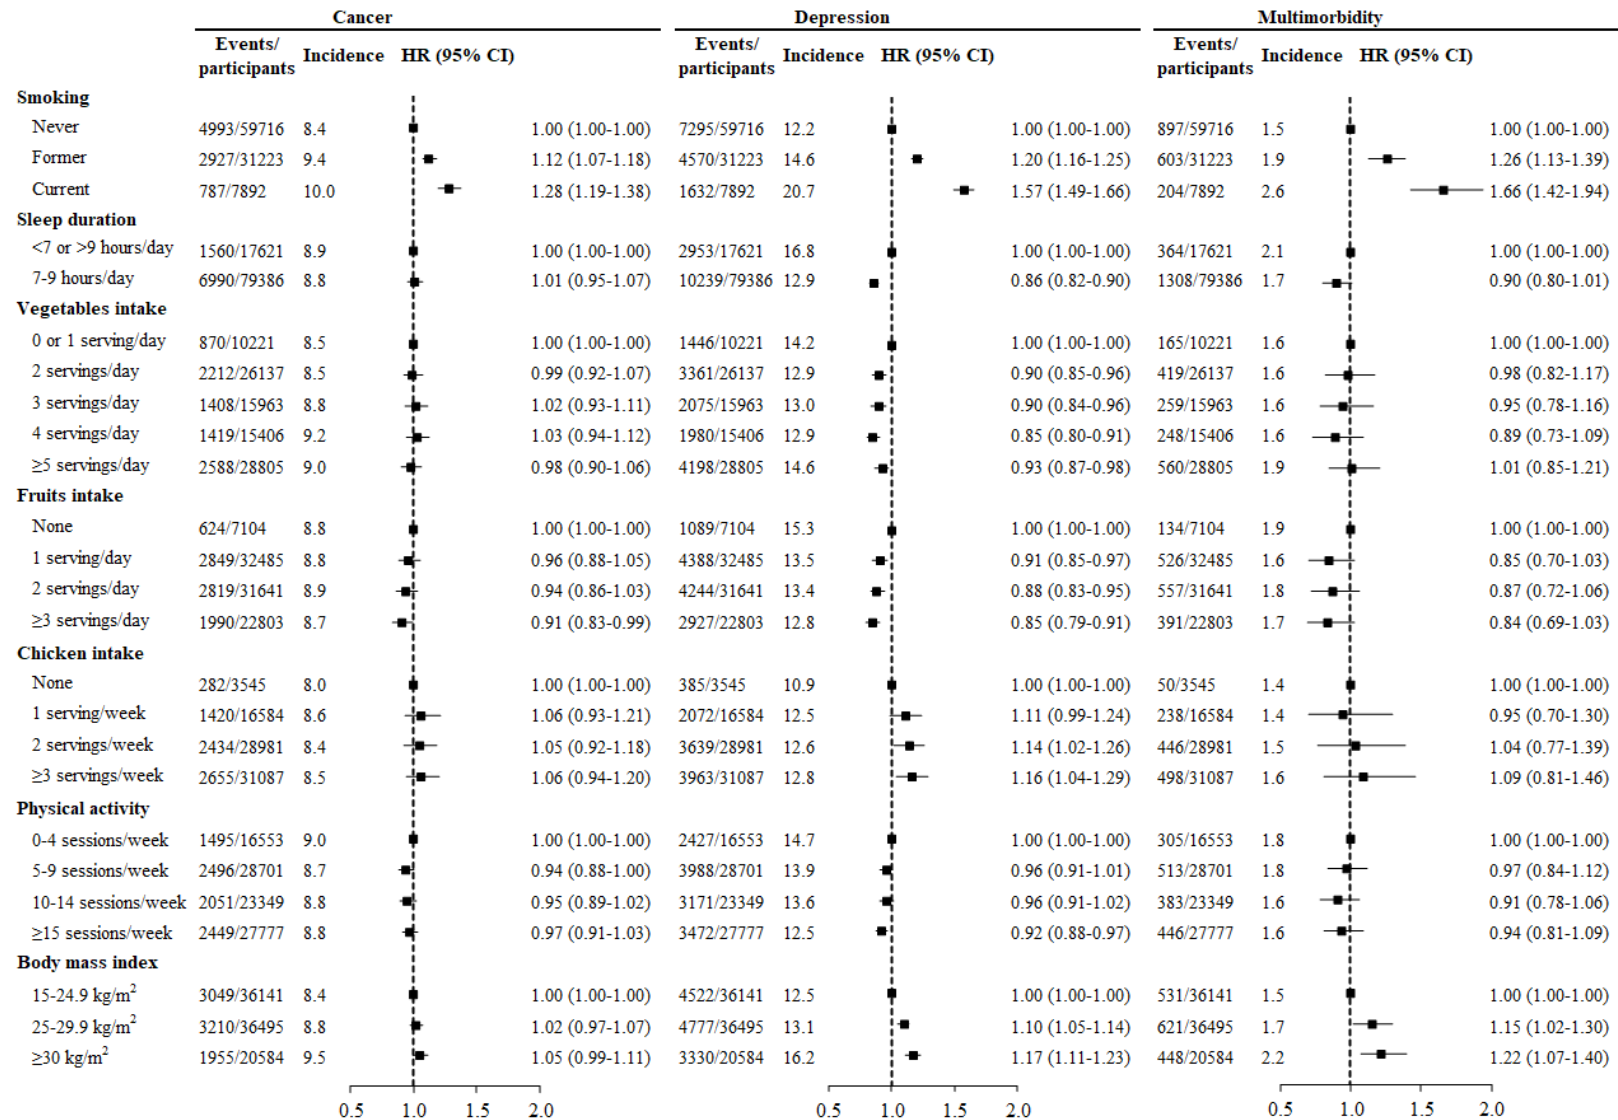



**Figure S7.** Hazard ratios for incident cancer, depression, and multimorbidity associated with behavioral factors. Hazard ratios were assessed using Cox regression models adjusted for age, gender, country of birth, income, education, work status, number of children, BMI, psychological distress, hypertension, dyslipidemia, diabetes, asthma, arthritis, hip replacement, and family history of cancer, depression, heart disease, stroke, diabetes, hypertension, Parkinson's disease, and dementia.

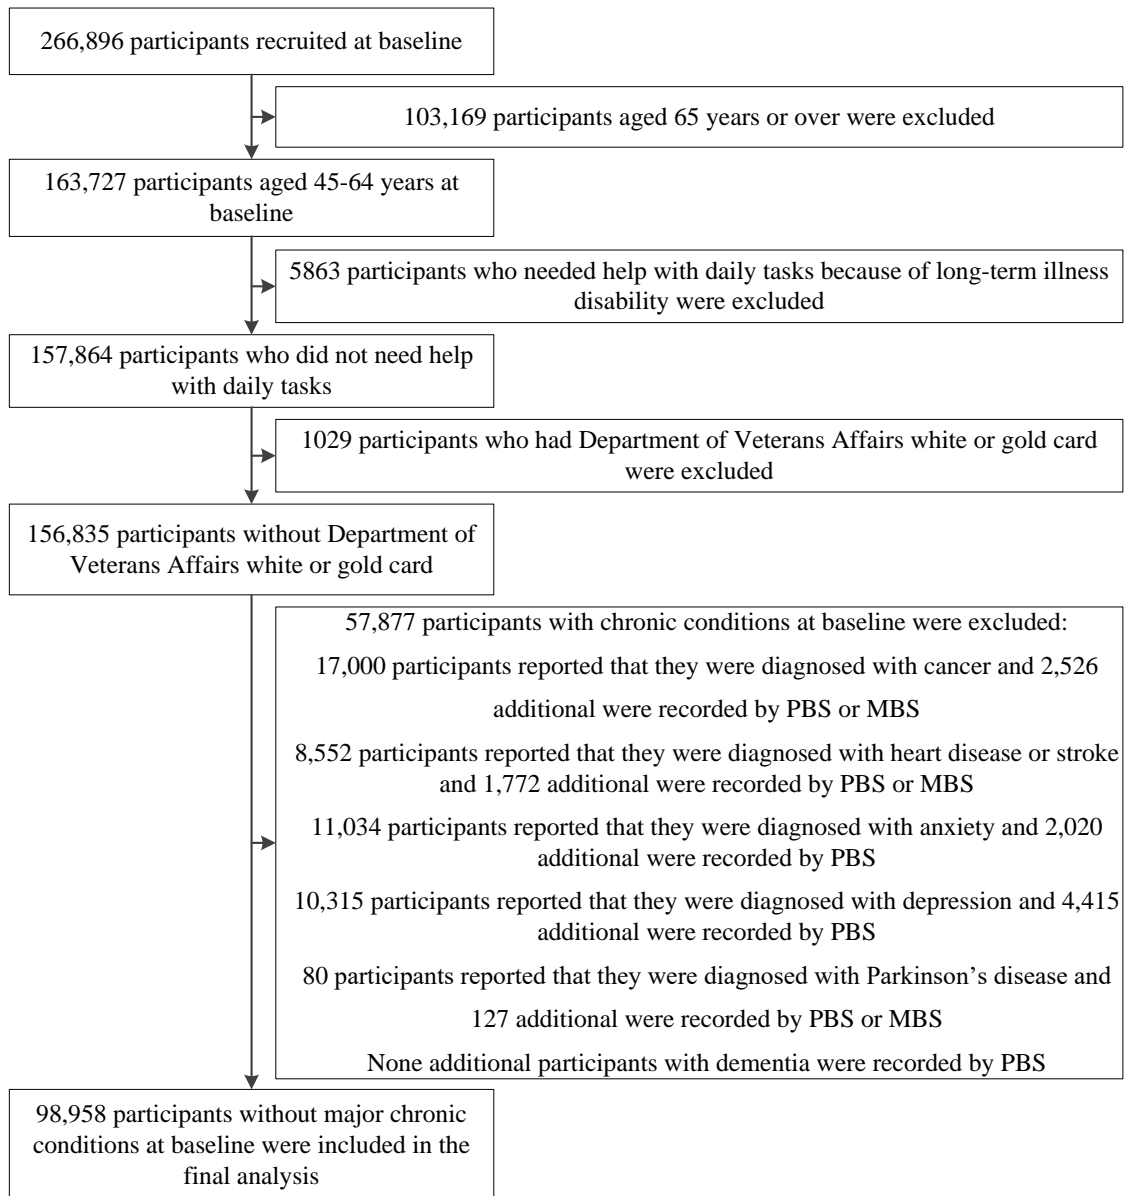

**Figure S8.** Flowchart of participant selection from the 45 and Up Study for the analysis in this study.

**Table S1.** List for Pharmaceutical Benefits Scheme and Medicare Benefits Schedule codes<sup>†</sup>.

| Chronic Conditions    | Pharmaceutical Benefits Scheme Codes                                                                                                                                                                                                                                                                                                                                                                                                                                                                                                                                                                                                                                                                                                                                                                                                                                                                                                                                                                                                                                                                                                                                                                                                                                                                                                                                                                                                                                                                                                                                                                                                                                                                   | ATC Codes for Pharmaceutical Benefits Scheme                                                                                                                                                                                                                                                                                                                                 | Medicare Benefits Schedule Codes                                                                                                                                                                                                                                                                                                                                                                                                                                                                                                                                                                                                                                                                                                                                                                                                                                                                                                            | Corresponding ICD Codes    |
|-----------------------|--------------------------------------------------------------------------------------------------------------------------------------------------------------------------------------------------------------------------------------------------------------------------------------------------------------------------------------------------------------------------------------------------------------------------------------------------------------------------------------------------------------------------------------------------------------------------------------------------------------------------------------------------------------------------------------------------------------------------------------------------------------------------------------------------------------------------------------------------------------------------------------------------------------------------------------------------------------------------------------------------------------------------------------------------------------------------------------------------------------------------------------------------------------------------------------------------------------------------------------------------------------------------------------------------------------------------------------------------------------------------------------------------------------------------------------------------------------------------------------------------------------------------------------------------------------------------------------------------------------------------------------------------------------------------------------------------------|------------------------------------------------------------------------------------------------------------------------------------------------------------------------------------------------------------------------------------------------------------------------------------------------------------------------------------------------------------------------------|---------------------------------------------------------------------------------------------------------------------------------------------------------------------------------------------------------------------------------------------------------------------------------------------------------------------------------------------------------------------------------------------------------------------------------------------------------------------------------------------------------------------------------------------------------------------------------------------------------------------------------------------------------------------------------------------------------------------------------------------------------------------------------------------------------------------------------------------------------------------------------------------------------------------------------------------|----------------------------|
| Cancer <sup>*,†</sup> | 1031G, 1079T, 1080W,<br>1134Q, 1144F, 1145G, 1160C,<br>1161D, 1162E, 1164G, 1265N,<br>1336H, 1340M, 1342P, 1390E,<br>1811H, 1929M, 1930N,<br>1931P, 1932Q, 2198Q, 2199R,<br>2315W, 2371T, 2372W,<br>2374Y, 2381H, 2521Q, 2528C,<br>2548D, 2561T, 2578Q, 2579R,<br>2580T, 2581W, 2582X, 2583Y,<br>2585C, 2884T, 2885W,<br>2904W, 2910E, 3017T, 3026G,<br>4222F, 4223G, 4309T, 4319H,<br>4326Q, 4327R, 4357H, 4360L,<br>4361M, 4364Q, 4394G,<br>4402Q, 4403R, 4428C, 4429D,<br>4431F, 4433H, 4439P, 4448D,<br>4451G, 4502Y, 4512L, 4514N,<br>4531L, 4567J, 4600D, 4610P,<br>4613T, 4614W, 4615X, 4618C,<br>4619D, 4620E, 4632T, 4639E,<br>4650R, 4703M, 4706Q, 4712B,<br>4713C, 4725Q, 4732C, 5149B,<br>5156J, 5270J, 5271K, 5272L,<br>5273M, 5274N, 5275P,<br>5428Q, 5429R, 5430T, 5431W,<br>5432X, 5433Y, 5462L, 5463M,<br>5464N, 5485Q, 5486R, 5487T,<br>5488W, 5489X, 5581R, 5582T,<br>5583W, 5584X, 5585Y, 5586B,<br>5587C, 5588D, 5589E, 5590F,<br>5591G, 5592H, 5593J, 5594K,<br>5595L, 5596M, 5597N, 5598P,<br>5705G, 5801H, 5804L, 5807P,<br>5808Q, 5809R, 5810T, 5811W,<br>5812X, 5813Y, 5814B, 5833B,<br>5834C, 5835D, 5842L, 5843M,<br>5844N, 5845P, 5846Q, 5847R,<br>5852B, 5854D, 5855E, 5856F,<br>5859J, 5860K, 5861L, 5862M,<br>5864P, 5865Q, 5866R, 5867T,<br>5868W, 5869X, 5872C,<br>5873D, 5874E, 5875F, 5876G,<br>5879K, 5880L, 5881M, 5882N,<br>5883P, 5887W, 5889Y, 5891C,<br>5892D, 5896H, 5897J, 5903Q,<br>5906W, 5907X, 5908Y, 5909B,<br>5910C, 5911D, 5912E, 5914G,<br>5915H, 5916J, 5917K, 5918L,<br>5919M, 5920N, 5921P,<br>5922Q, 5925W, 5926X, 5927Y,<br>5931E, 5932F, 5933G, 5934H,<br>5935J, 5936K, 5937L, 5943T,<br>5944W, 5957M, 5958N,<br>5959P, 5962T, 5963W, 5964X, | L01AA01, L01AA02,<br>L01AA03, L01AA06,<br>L01AB01, L01AX03,<br>L01BA01, L01BA03,<br>L01BA04, L01BB02,<br>L01BB03, L01BB04,<br>L01BC01, L01BC02,<br>L01BC05, L01BC06,<br>L01CA01, L01CA02,<br>L01CA04, L01CB01,<br>L01CD01, L01CD02,<br>L01DB01, L01DB07,<br>L01DC01, L01XA01,<br>L01XA02, L01XC02,<br>L01XC03, L01XE01,<br>L01XE06, L01XE07,<br>L01XX05, L01XX19,<br>L01XX32 | 32036, 32099, 32102,<br>32103, 32104, 32106,<br>32108, 30299, 30300,<br>30301, 30302, 30303,<br>42801, 42802, 42803,<br>42805, 42807, 42809,<br>31340, 52036, 52039,<br>52048, 52045, 52042,<br>31372, 31373, 31374,<br>31375, 31376, 37227,<br>35720, 13915, 13918,<br>13921, 13924, 13927,<br>13930, 13933, 13936,<br>13939, 13942, 13945,<br>13948, 15000, 15003,<br>15006, 15009, 15012,<br>15100, 15103, 15106,<br>15109, 15112, 15115,<br>15211, 15214, 15215,<br>15218, 15221, 15224,<br>15227, 15230, 15233,<br>15236, 15239, 15242,<br>15245, 15248, 15251,<br>15254, 15257, 15260,<br>15263, 15266, 15269,<br>15272, 15275, 15303,<br>15304, 15307, 15308,<br>15311, 15312, 15315,<br>15316, 15319, 15320,<br>15323, 15324, 15327,<br>15328, 15331, 15332,<br>15335, 15336, 15339,<br>15342, 15345, 15348,<br>15351, 15354, 15357,<br>15600, 15700, 15705,<br>15710, 15715, 15900,<br>16003, 16006, 16009,<br>16012, 16015, 16018 | C00-C97<br>(excluding C44) |

---

5965Y, 5966B, 5973J, 5974K,  
5975L, 5976M, 5977N, 5978P,  
5979Q, 5980R, 5981T, 5982W,  
5983X, 5988E, 5989F, 5990G,  
5991H, 5992J, 5993K, 6007E,  
6008F, 6009G, 6010H, 6249X,  
6440Y, 6441B, 6444E, 6445F,  
6446G, 6447H, 6497Y, 6687Y,  
6688B, 6689C, 6690D, 6691E,  
6692F, 6693G, 6694H, 6695J,  
6696K, 6697L, 6698M, 6699N,  
6700P, 6701Q, 6702R, 6703T,  
6704W, 6705X, 6706Y, 6707B,  
6708C, 6709D, 6710E, 6711F,  
6713H, 6714J, 6716L, 6843E,  
6844F, 6845G, 6846H, 6847J,  
6848K, 6891Q, 6892R, 6893T,  
6894W, 6895X, 6896Y, 7050C,  
7051D, 7052E, 7053F, 7054G,  
7055H, 7086Y, 7087B, 7088C,  
7089D, 7222D, 7224F, 7225G,  
7226H, 7227J, 7228K, 7229L,  
7230M, 7234R, 7235T, 7237X,  
7238Y, 7239B, 7244G, 7246J,  
7248L, 7249M, 7250N, 7251P,  
7252Q, 7254T, 7255W, 7256X,  
7257Y, 7258B, 7259C, 7261E,  
7262F, 7263G, 7264H, 7265J,  
7266K, 7267L, 7268M, 7269N,  
7270P, 7271Q, 7272R, 7274W,  
7275X, 7281F, 7282G, 7283H,  
7284J, 7285K, 8018B, 8033T,  
8034W, 8049P, 8050Q, 8071T,  
8074Y, 8076C, 8077D, 8120J,  
8280T, 8281W, 8284B, 8293L,  
8294M, 8360B, 8414W,  
8415X, 8515E, 8569B, 8570C,  
8665C, 8666D, 8800E, 8809P,  
8827N, 8828P, 8850T, 8851W,  
8852X, 8863L, 8967Y, 8986Y,  
8987B, 8988C, 8989D, 8990E,  
8991F, 8992G, 8995K, 8996L,  
9005Y, 9117W, 9118X, 9119Y,  
9130M, 9131N, 9282M,  
9283N, 9284P, 9291B, 9341P,  
9401T, 9402W, 9410G, 9414L,  
9415M, 9463C, 9689Y, 9690B,  
9691C, 9713F, 9729C,  
10148D, 10150F, 10158P,  
10165B, 10179R, 10193L,  
10269L, 10270M, 10296X,  
10324J, 10346M, 10362J,  
10381J, 10383L, 10391X,  
10401K, 10402L, 10423N,  
10575N, 10576P, 10581X,  
10583B, 10588G, 10589H,  
10591K, 10593M, 10595P,  
10597R, 10708N, 10710Q,  
10720F, 10741H, 10743K,

---

|                         |                                                                                                                                                                                                                                                                                                                                                                                                                                         |                                                                                                                                                                                                                                    |   |          |
|-------------------------|-----------------------------------------------------------------------------------------------------------------------------------------------------------------------------------------------------------------------------------------------------------------------------------------------------------------------------------------------------------------------------------------------------------------------------------------|------------------------------------------------------------------------------------------------------------------------------------------------------------------------------------------------------------------------------------|---|----------|
|                         | 10744L, 10811B, 10817H,<br>10829Y                                                                                                                                                                                                                                                                                                                                                                                                       |                                                                                                                                                                                                                                    |   |          |
| Depression <sup>†</sup> | 2418G, 2429W, 2417F, 1561E,<br>1358L, 1357K, 1012G, 1011F,<br>1013H, 2420J, 2421K, 2523T,<br>2522R, 8702B, 8703C, 8220P,<br>8700X, 8701Y, 10181W,<br>8270G, 1434L, 8174F, 8512B,<br>2242B, 2237R, 2236Q, 8837D,<br>8836C, 2856H, 2444P, 8003F,<br>1900B, 10234P, 10241B,<br>9366Y, 10231L, 10245F,<br>9367B, 9156X, 9155W, 8290H,<br>3059B, 1628Q, 1627P, 8513C,<br>8856D, 8883M, 8855C, 9365X,<br>8857E, 8583R, 8868R, 8302Y,<br>8301X | N06AA02, N06AA04,<br>N06AA09, N06AA10,<br>N06AA12, N06AA16,<br>N06AB03, N06AB04,<br>N06AB05, N06AB06,<br>N06AB08, N06AB10,<br>N06AB03, N06AF03,<br>N06AF04, N06AG02,<br>N06AX03, N06AX11,<br>N06AX16, N06AX18,<br>N06AX21, N06AX23 | – | F32, F33 |
| Anxiety <sup>†</sup>    | 3135B, 3134Y, 5355W, 5356X,<br>5372R, 5371Q, 4144D, 4145E,<br>3135B, 3134Y, 9432K, 9433L,<br>10181W, 5357Y, 5358B,<br>5373T, 5374W, 4150K,<br>4151L, 4216X, 4522B, 8700X,<br>8701Y, 8849R                                                                                                                                                                                                                                               | N05BA01, N05BA04,<br>N05BA08, N05BA12,<br>N05BE01                                                                                                                                                                                  | – | F41.1    |

ATC, Anatomical Therapeutic Chemical Classification; ICT, International Classification of Diseases.

\* Non-melanoma skin cancer was excluded in our analysis.

<sup>†</sup> Pharmaceutical Benefits Scheme (PBS) codes were consistent with the corresponding Anatomical Therapeutic Chemical codes listed in a previous publication based on the 45 and Up Study [8]. We used PBS codes instead of ATC codes for diagnosis detection where each ATC code may include numerous PBS codes. Different PBS codes within one ATC code represent different doses, forms (pill or liquid), intake methods (oral intake or injection), and specific conditions, which helps distinguish the claim purposes for different conditions.

**Table S2.** Combinations of the hyper-parameters with best performance for random forest\*.

| Variables | Random Forest                                                |
|-----------|--------------------------------------------------------------|
| Men       | max_depth = 5, mtries = 7, seed = 1, nfolds = 5, ntree = 500 |
| Women     | max_depth = 6, mtries = 4, seed = 1, nfolds = 5, ntree = 500 |
| All       | max_depth = 6, mtries = 4 seed = 1, nfolds = 5, ntree = 500  |

\* These combinations of the hyper-parameters with best performance would then be separately applied in the machine learning in the final analysis.

**Table S3.** Area under curve by random forest\*.

| Variables | Random Forest |
|-----------|---------------|
| Male      | 0.6597        |
| Female    | 0.6176        |
| All       | 0.6592        |

\* We randomly selected 70% to the total population as training data and the remaining 30% as testing data. The testing data were used to evaluate the area under curve for both cross-sectional and longitudinal analysis.

**Table S4.** Twenty leading predictors by random forest in the longitudinal analysis\*.

| Ranking | Men                                 |                                  | Women                               |                                  | All                                 |                                  |
|---------|-------------------------------------|----------------------------------|-------------------------------------|----------------------------------|-------------------------------------|----------------------------------|
|         | Predictor                           | Percentage of variance explained | Predictor                           | Percentage of variance explained | Predictor                           | Percentage of variance explained |
| 1       | Age                                 | 9.0                              | Smoking                             | 5.4                              | Age                                 | 8.0                              |
| 2       | Relative socioeconomic disadvantage | 4.8                              | Self-rated quality of life          | 4.7                              | Self-rated quality of life          | 5.4                              |
| 3       | Psychological distress              | 3.8                              | Self-rated health                   | 4.2                              | Asthma                              | 4.5                              |
| 4       | Education                           | 3.6                              | Chicken intake                      | 3.8                              | Self-rated health                   | 4.4                              |
| 5       | Diabetes                            | 3.5                              | Red meat intake                     | 3.7                              | Psychological distress              | 4.2                              |
| 6       | Smoking                             | 3.5                              | Psychological distress              | 3.5                              | Gender                              | 4.2                              |
| 7       | Self-rated health                   | 3.4                              | Arthritis                           | 3.3                              | Red meat intake                     | 3.6                              |
| 8       | Income                              | 3.3                              | Relative socioeconomic disadvantage | 3.2                              | Smoking                             | 3.6                              |
| 9       | Red meat intake                     | 3.2                              | Vegetables intake                   | 3.2                              | Chicken intake                      | 3.4                              |
| 10      | Asthma                              | 2.9                              | Asthma                              | 3.1                              | Income                              | 3.3                              |
| 11      | Sleep time                          | 2.9                              | Alcohol consumption                 | 2.6                              | Vegetables intake                   | 2.6                              |
| 12      | Sitting time                        | 2.9                              | Age                                 | 2.6                              | Ancestry                            | 2.4                              |
| 13      | Chicken intake                      | 2.8                              | Sitting time                        | 2.5                              | Arthritis                           | 2.4                              |
| 14      | Vegetables intake                   | 2.7                              | BMI                                 | 2.5                              | BMI                                 | 2.4                              |
| 15      | Physical activity                   | 2.6                              | Income                              | 2.5                              | Relative socioeconomic disadvantage | 2.3                              |
| 16      | Self-rated quality of life          | 2.5                              | Working status                      | 2.5                              | Working status                      | 2.2                              |
| 17      | Fish intake                         | 2.4                              | Outdoor physical activity           | 2.4                              | Alcohol consumption                 | 2.1                              |
| 18      | Rurality                            | 2.3                              | Milk intake                         | 2.3                              | Fruit intake                        | 2.1                              |
| 19      | Milk intake                         | 2.2                              | Fruit intake                        | 2.2                              | Education                           | 2.0                              |
| 20      | Fruit intake                        | 2.1                              | Health insurance                    | 2.2                              | Sitting time                        | 2.0                              |

\* Machine learning methods were used to evaluate the importance of predictors in men and women separately and also in the total population.

**Table S5.** The hazard ratio for incident mental disorders associated with cancer at baseline.

| Variable           | Events/<br>Participants | Incidence | HR (95% CI)*     | p-value |
|--------------------|-------------------------|-----------|------------------|---------|
| Men                | –                       | –         | –                | <0.0001 |
| Cancer at baseline | –                       | –         | –                | –       |
| No                 | 6016/44,402             | 13.6      | 1.00 (1.00–1.00) | –       |
| Yes                | 840/5077                | 16.6      | 1.19 (1.11–1.28) | –       |
| Women              | –                       | –         | –                | <0.0001 |
| Cancer at baseline | –                       | –         | –                | –       |
| No                 | 10,929/53,538           | 20.4      | 1.00 (1.00–1.00) | –       |
| Yes                | 1714/7485               | 22.9      | 1.11 (1.05–1.16) | –       |
| All                | –                       | –         | –                | <0.0001 |
| Cancer at baseline | –                       | –         | –                | –       |
| No                 | 16,945/97,940           | 17.3      | 1.00 (1.00–1.00) | –       |
| Yes                | 2554/12,562             | 20.3      | 1.15 (1.10–1.20) | –       |

\* Hazard ratios were assessed using Cox regression models adjusted for age, gender, country of birth, income, education, work status, number of parenting children, BMI, psychological distress, hypertension, dyslipidemia, diabetes, asthma, arthritis, hip replacement, and family history of cancer, depression, heart disease, stroke, diabetes, hypertension, Parkinson's disease, and dementia.

**Table S6.** The hazard ratio for incident cancer associated with mental disorders at baseline.

| Variable                     | Events/Participants | Incidence | HR (95% CI)*     | p value |
|------------------------------|---------------------|-----------|------------------|---------|
| Men                          | –                   | –         | –                | 0.83    |
| Mental disorders at baseline | –                   | –         | –                | –       |
| No                           | 3679/44,402         | 8.3       | 1.00 (1.00–1.00) | –       |
| Yes                          | 686/8323            | 8.2       | 0.98 (0.90–1.07) | –       |
| Women                        | –                   | –         | –                | –       |
| Mental disorders at baseline | –                   | –         | –                | 0.39    |
| No                           | 4940/53,538         | 9.2       | 1.00 (1.00–1.00) | –       |
| Yes                          | 1759/18,530         | 9.5       | 1.03 (0.97–1.10) | –       |
| All                          | –                   | –         | –                | –       |
| Mental disorders at baseline | –                   | –         | –                | 0.32    |
| No                           | 8619/97,940         | 8.8       | 1.00 (1.00–1.00) | –       |
| Yes                          | 2445/26,853         | 9.1       | 1.03 (0.98–1.08) | –       |

\* Hazard ratios were assessed using Cox regression models adjusted for age, gender, country of birth, income, education, work status, number of parenting children, BMI, psychological distress, hypertension, dyslipidemia, diabetes, asthma, arthritis, hip replacement, and family history of cancer, depression, heart disease, stroke, diabetes, hypertension, Parkinson's disease, and dementia.

## References

1. Australian Institute of Health and Welfare. The Active Australia Survey: a guide and manual for implementation analysis and reporting, Canberra, Australia, 2003.
2. Australian Bureau of Statistics. 2039.0–Information paper: an introduction to socio-economic indexes for areas (SEIFA), 2006; Canberra, Australia, 2008.
3. Australian Population and Migration Research Centre. *Accessibility/Remoteness Index of Australia*; Australian Population and Migration Research Centre: Adelaide, Australia, 2012.
4. Kessler, R.C.; Andrews, G.; Colpe, L.J.; Hiripi, E.; Mroczek, D.K.; Normand, S.-L.T.; Walters, E.E.; Zaslavsky, A.M. Short screening scales to monitor population prevalences and trends in non-specific psychological distress. *Psychol. Med.* **2002**, *32*, 959–976, doi:10.1017/s0033291702006074.
5. Goodger, B.; Byles, J.; Higganbotham, N.; Mishra, G. Assessment of a short scale to measure social support among older people. *Aust. New Zealand J. Public Heal.* **1999**, *23*, 260–265, doi:10.1111/j.1467-842x.1999.tb01253.x.
6. Breiman, L. Random forests. *Machine Learning* **2001**, *45*, 5–32.
7. Kuhn M.; Johnson K. *Applied predictive modeling*; Springer: New York, NY, USA, 2013.
8. Lujic, S.; Simpson, J.M.; Zwar, N.; Hosseinzadeh, H.; Jorm, L. Multimorbidity in Australia: Comparing estimates derived using administrative data sources and survey data. *PLoS One* **2017**, *12*, e0183817, doi:10.1371/journal.pone.0183817.



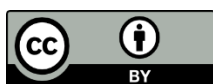

© 2020 by the authors. Licensee MDPI, Basel, Switzerland. This article is an open access article distributed under the terms and conditions of the Creative Commons Attribution (CC BY) license (<http://creativecommons.org/licenses/by/4.0/>).
